# Supplementary material
Source: PubMed Central journal article supplement (PMC8829588)
Supplement: NIHMS1771310-supplement-supplementary_materials.pdf [file NIHMS1771310-supplement-supplementary_materials.pdf]

## SUPPLEMENTAL MATERIALS

### TITLE:

**Hydration in relation to water insecurity, heat index, and lactation status in two small-scale populations in hot-humid and hot-arid environments**

### AUTHORS:

Hilary J. Bethancourt <sup>1,\*</sup>,  
Zane S. Swanson <sup>2</sup>  
Rosemary Nzunza <sup>3</sup>  
Tomas Huanca <sup>4</sup>  
Esther Conde <sup>4</sup>  
W. Larry Kenney <sup>5</sup>  
Sera L. Young <sup>6</sup>  
Emmanuel Ndiema <sup>7</sup>  
David Braun <sup>8,9</sup>  
Herman Pontzer <sup>2,10</sup>  
Asher Y. Rosinger <sup>1,11\*</sup>

### AFFILIATIONS:

<sup>1</sup> Department of Biobehavioral Health, The Pennsylvania State University, University Park, PA  
<sup>2</sup> Department of Evolutionary Anthropology, Duke University, Durham, NC  
<sup>3</sup> Kenya Medical Research Institute (KEMRI), Nairobi, Kenya  
<sup>4</sup> Centro Boliviano de Investigacion y Desarrollo Socio Integral (CBIDSI), San Borja, Bolivia  
<sup>5</sup> Department of Kinesiology, The Pennsylvania State University, University Park, Pennsylvania  
<sup>6</sup> Department of Anthropology, Northwestern University, Evanston, IL, 60208  
<sup>7</sup> Department of Earth Sciences, National Museums of Kenya, Nairobi, Kenya  
<sup>8</sup> Center for the Advanced Study of Human Paleobiology, Department of Anthropology, The George Washington University, Washington  
<sup>9</sup> Department of Human Evolution, Max Planck Institute of Evolutionary Anthropology, 04103 Leipzig, Germany;  
<sup>10</sup> Global Health Institute, Duke University, Durham, NC  
<sup>11</sup> Department of Anthropology, The Pennsylvania State University, University Park, PA

## **SUPPLEMENTAL INFORMATION**

### **List of questions used for the Household Water InSecurity Experience (HWISE) Scale**

The following list of questions used to assess household water insecurity are from the validated Household Water InSecurity Experience (HWISE) Scale questionnaire (Young, Boateng, et al., 2019; Young, Collins, et al., 2019).

- 1) In the last 4 weeks, how frequently did you or anyone in your household worry you would not have enough water for all of your household needs?
- 2) In the last 4 weeks, how frequently has your household water supply from your main water source been interrupted or limited (e.g. water pressure, less water than expected)?
- 3) In the last 4 weeks, how frequently has there not been enough water in the household to wash clothes?
- 4) In the last 4 weeks, how frequently have you or anyone in your household had to change what was being eaten because there were problems with water (e.g. for washing foods, cooking, etc.)?
- 5) In the last 4 weeks, how frequently have you or anyone in your household had to go without washing hands after dirty activities (e.g., defecating or changing diapers, cleaning animal dung) because of problems with water?
- 6) In the last 4 weeks, how frequently have you or anyone in your household had to go without bathing because of problems with water (e.g., lack of water, unclean water, etc.)?
- 7) In the last 4 weeks, how frequently has your or anyone in your household's day been interrupted by problems with your water situation, such as problems getting or distributing water within the household? (Activities that may have been interrupted include caring for others, doing household chores, or attending social events, etc.)
- 8) In the last 4 weeks, how frequently did you or anyone in your household feel angry about your water situation?
- 9) In the last 4 weeks, how frequently has there not been as much water to drink as you would like for you or anyone in your household?
- 10) In the last 4 weeks, how frequently have you or anyone in your household gone to sleep thirsty because there wasn't any water to drink?
- 11) In the last 4 weeks, how frequently has there been no useable water whatsoever in your household?
- 12) In the last 4 weeks, how frequently have problems with water caused you or anyone in your household to feel ashamed/excluded/stigmatized?

Options and scoring for these questions were as follows:

- 0... Never (0 times in the last 4 weeks)
- 1... Rarely (1-2 times in the last 4 weeks)
- 2... Sometimes (3-10 times in the last 4 weeks)
- 3... Often or always (11+ times in the last 4 weeks)

### **List of questions used for the Household Food Insecurity Access Scale (HFIAS)**

The following list of questions used to assess household water insecurity are from the validated Household Food Insecurity Access Scale (HFIAS) questionnaire (Coates et al., 2007).

- 1) In the past four weeks, did you worry that your household would not have enough food?
- 2) In the past four weeks, were you or any household member not able to eat the kinds of foods you preferred because of a lack of resources?
- 3) In the past four weeks, did you or any household member have to eat a limited variety of foods due to a lack of resources?
- 4) In the past four weeks, did you or any household member have to eat some foods that you really did not want to eat because of a lack of resources to obtain other types of food?
- 5) In the past four weeks, did you or any household member have to eat a smaller meal than you felt you needed because there was not enough food?
- 6) In the past four weeks, did you or any household member have to eat fewer meals in a day because there was not enough food?
- 7) In the past four weeks, was there ever no food to eat of any kind in your household because of lack of resources to get food?
- 8) In the past four weeks, did you or any household member go to sleep at night hungry because there was not enough food?
- 9) In the past four weeks, did you or any household member go a whole day and night without eating anything because there was not enough food?

Options and scoring for these questions were as follows:

- 0... Never (0 times in the last 4 weeks)
- 1... Rarely (1-2 times in the last 4 weeks)
- 2... Sometimes (3-10 times in the last 4 weeks)
- 3... Often or always (11+ times in the last 4 weeks)

**SUPPLEMENTAL TABLES**

**Supplemental Table 1. All multiple logistic regression models run for Tsimane' Men**

|                                | OR<br>(95% CI)          | OR<br>(95% CI)         | OR<br>(95% CI)           | OR<br>(95% CI)          | OR<br>(95% CI)           | OR<br>(95% CI)           | OR<br>(95% CI)          | OR<br>(95% CI)           | OR<br>(95% CI)          | OR<br>(95% CI)           | OR<br>(95% CI)           |
|--------------------------------|-------------------------|------------------------|--------------------------|-------------------------|--------------------------|--------------------------|-------------------------|--------------------------|-------------------------|--------------------------|--------------------------|
| Individual's age (years)       | 1.01<br>(0.99 - 1.03)   | 1.01<br>(0.99 - 1.02)  | 1.01<br>(0.99 - 1.03)    | 1.01<br>(0.99 - 1.03)   | 1.01<br>(0.99 - 1.03)    | 1.01<br>(0.99 - 1.03)    | 1.01<br>(0.99 - 1.03)   | 1.01<br>(0.99 - 1.03)    | 1.01<br>(0.99 - 1.03)   | 1.01<br>(0.99 - 1.03)    | 1.01<br>(1.00 - 1.03)    |
| BMI (kg/m <sup>2</sup> )       | 1.10<br>(0.97 - 1.25)   | 1.14*<br>(1.01 - 1.29) | 1.09<br>(0.96 - 1.24)    | 1.10<br>(0.97 - 1.25)   | 1.10<br>(0.97 - 1.25)    | 1.10<br>(0.97 - 1.26)    | 1.11<br>(0.97 - 1.27)   | 1.08<br>(0.95 - 1.23)    | 1.10<br>(0.97 - 1.25)   |                          |                          |
| Afternoon sample               | 1.45<br>(0.82 - 2.58)   | 1.90*<br>(1.11 - 3.25) |                          | 1.45<br>(0.82 - 2.58)   | 1.45<br>(0.82 - 2.57)    | 1.42<br>(0.80 - 2.53)    | 1.55<br>(0.84 - 2.86)   | 1.45<br>(0.81 - 2.60)    | 1.45<br>(0.82 - 2.57)   | 1.42<br>(0.80 - 2.52)    | 1.45<br>(0.81 - 2.57)    |
| Heat Index                     | 1.22**<br>(1.08 - 1.38) |                        | 1.25***<br>(1.11 - 1.41) | 1.22**<br>(1.08 - 1.38) | 1.23***<br>(1.09 - 1.38) | 1.23***<br>(1.09 - 1.40) | 1.22**<br>(1.07 - 1.39) | 1.25***<br>(1.10 - 1.41) | 1.22**<br>(1.08 - 1.38) | 1.24***<br>(1.10 - 1.40) | 1.23***<br>(1.09 - 1.39) |
| Time to collect water (10 min) | 0.94<br>(0.64 - 1.38)   | 0.97<br>(0.65 - 1.44)  | 0.93<br>(0.64 - 1.36)    | 0.93<br>(0.63 - 1.38)   | 0.93<br>(0.63 - 1.38)    | 0.91<br>(0.61 - 1.36)    | 0.82<br>(0.53 - 1.26)   | 0.93<br>(0.63 - 1.38)    | 0.93<br>(0.64 - 1.37)   | 0.93<br>(0.63 - 1.36)    | 0.95<br>(0.64 - 1.42)    |
| HWISE score                    |                         |                        |                          | 1.00<br>(0.90 - 1.11)   | 1.01<br>(0.90 - 1.13)    | 1.15<br>(0.86 - 1.55)    |                         |                          |                         |                          |                          |
| HFIAS score                    |                         |                        |                          |                         | 0.99<br>(0.91 - 1.07)    | 1.01<br>(0.92 - 1.10)    |                         |                          |                         |                          |                          |
| HWISE x HFIAS Interaction      |                         |                        |                          |                         |                          | 0.99<br>(0.96 - 1.01)    |                         |                          |                         |                          |                          |
| Born in wet season             |                         |                        |                          |                         |                          |                          | 1.24<br>(0.68 - 2.26)   |                          |                         |                          |                          |
| Days/week of meat/fish         |                         |                        |                          |                         |                          |                          |                         | 0.98<br>(0.83 - 1.16)    |                         |                          |                          |
| Diarrhea or fever              |                         |                        |                          |                         |                          |                          |                         |                          | 0.89<br>(0.21 - 3.72)   |                          |                          |
| Body fat percentage (BIA)      |                         |                        |                          |                         |                          |                          |                         |                          |                         | 1.03<br>(0.96 - 1.11)    |                          |
| Calculated Fat-Free Mass       |                         |                        |                          |                         |                          |                          |                         |                          |                         |                          | 1.04<br>(0.98 - 1.11)    |
| Observations                   | 224                     | 224                    | 224                      | 224                     | 224                      | 224                      | 197                     | 221                      | 224                     | 224                      | 224                      |
| Log-Likelihood Full Model      | -143.9                  | -150                   | -144.7                   | -143.9                  | -143.8                   | -143.3                   | -124.9                  | -141.5                   | -143.9                  | -144.6                   | -144                     |
| Chi-square test                | 17.92                   | 9.622                  | 16.45                    | 17.91                   | 18.02                    | 18.97                    | 18.47                   | 18.63                    | 17.92                   | 16.97                    | 20.51                    |
| P-value of Chi-square test     | 0.00305                 | 0.0473                 | 0.00247                  | 0.00645                 | 0.0119                   | 0.0150                   | 0.00517                 | 0.00484                  | 0.00644                 | 0.00455                  | 0.00100                  |
| AIC                            | 299.7                   | 310.1                  | 299.4                    | 301.7                   | 303.6                    | 304.6                    | 263.8                   | 297                      | 301.7                   | 301.2                    | 300                      |
| BIC                            | 320.2                   | 327.1                  | 316.4                    | 325.6                   | 330.9                    | 335.3                    | 286.8                   | 320.8                    | 325.6                   | 321.6                    | 320.5                    |
| Pseudo R <sup>2</sup>          | 0.0734                  | 0.0337                 | 0.0682                   | 0.0734                  | 0.0737                   | 0.0770                   | 0.0851                  | 0.0762                   | 0.0734                  | 0.0688                   | 0.0725                   |
| Hosmer-Lemeshow P-value        | 0.770                   | 0.478                  | 0.400                    | 0.771                   | 0.751                    | 0.966                    | 0.558                   | 0.787                    | 0.618                   | 0.715                    | 0.884                    |

**Supplemental Table 2. All multiple logistic regression models run for Tsimane' Women**

|                                | OR<br>(95% CI)           | OR<br>(95% CI)          | OR<br>(95% CI)           | OR<br>(95% CI)           | OR<br>(95% CI)           | OR<br>(95% CI)           | OR<br>(95% CI)           | OR<br>(95% CI)           | OR<br>(95% CI)           | OR<br>(95% CI)           | OR<br>(95% CI)           |
|--------------------------------|--------------------------|-------------------------|--------------------------|--------------------------|--------------------------|--------------------------|--------------------------|--------------------------|--------------------------|--------------------------|--------------------------|
| Individual's age (years)       | 1.02*<br>(1.00 - 1.05)   | 1.02*<br>(1.00 - 1.04)  | 1.02*<br>(1.00 - 1.05)   | 1.02*<br>(1.00 - 1.05)   | 1.03*<br>(1.00 - 1.05)   | 1.03*<br>(1.00 - 1.05)   | 1.03*<br>(1.00 - 1.05)   | 1.02*<br>(1.00 - 1.04)   | 1.02*<br>(1.00 - 1.05)   | 1.02<br>(1.00 - 1.04)    | 1.03*<br>(1.01 - 1.05)   |
| BMI (kg/m <sup>2</sup> )       | 1.06<br>(0.97 - 1.15)    | 1.06<br>(0.98 - 1.14)   | 1.06<br>(0.97 - 1.15)    | 1.06<br>(0.97 - 1.15)    | 1.06<br>(0.98 - 1.15)    | 1.06<br>(0.98 - 1.15)    | 1.11*<br>(1.01 - 1.23)   | 1.06<br>(0.98 - 1.16)    | 1.05<br>(0.97 - 1.14)    |                          |                          |
| Afternoon sample               | 1.01<br>(0.57 - 1.81)    | 1.32<br>(0.76 - 2.27)   |                          | 1.02<br>(0.57 - 1.83)    | 1.02<br>(0.57 - 1.83)    | 1.00<br>(0.56 - 1.80)    | 0.76<br>(0.40 - 1.45)    | 1.07<br>(0.59 - 1.92)    | 1.01<br>(0.57 - 1.81)    | 1.00<br>(0.56 - 1.80)    | 1.02<br>(0.57 - 1.82)    |
| Heat Index                     | 1.32***<br>(1.17 - 1.49) |                         | 1.32***<br>(1.17 - 1.49) | 1.32***<br>(1.17 - 1.50) | 1.34***<br>(1.18 - 1.51) | 1.34***<br>(1.18 - 1.53) | 1.31***<br>(1.15 - 1.49) | 1.32***<br>(1.17 - 1.50) | 1.32***<br>(1.17 - 1.49) | 1.33***<br>(1.18 - 1.50) | 1.31***<br>(1.16 - 1.49) |
| Time to collect water (10 min) | 1.18<br>(0.84 - 1.67)    | 1.18<br>(0.83 - 1.68)   | 1.18<br>(0.84 - 1.67)    | 1.16<br>(0.82 - 1.63)    | 1.15<br>(0.81 - 1.64)    | 1.15<br>(0.81 - 1.64)    | 1.18<br>(0.80 - 1.73)    | 1.22<br>(0.85 - 1.77)    | 1.19<br>(0.84 - 1.69)    | 1.19<br>(0.84 - 1.69)    | 1.21<br>(0.85 - 1.72)    |
| HWISE score                    |                          |                         |                          | 1.07<br>(0.99 - 1.17)    | 1.10<br>(1.00 - 1.21)    | 1.21<br>(0.88 - 1.65)    |                          |                          |                          |                          |                          |
| HFIAS score                    |                          |                         |                          |                          | 0.96<br>(0.88 - 1.04)    | 0.97<br>(0.89 - 1.06)    |                          |                          |                          |                          |                          |
| HWISE x HFIAS Interaction      |                          |                         |                          |                          |                          | 0.99<br>(0.96 - 1.02)    |                          |                          |                          |                          |                          |
| Born in wet season             |                          |                         |                          |                          |                          |                          | 0.83<br>(0.45 - 1.54)    |                          |                          |                          |                          |
| Days/week of meat/fish         |                          |                         |                          |                          |                          |                          |                          | 0.91<br>(0.76 - 1.08)    |                          |                          |                          |
| Diarrhea or fever              |                          |                         |                          |                          |                          |                          |                          |                          | 2.86<br>(0.41 - 19.81)   |                          |                          |
| Body fat percentage (BIA)      |                          |                         |                          |                          |                          |                          |                          |                          |                          | 1.03<br>(0.99 - 1.07)    |                          |
| Calculated Fat-Free Mass       |                          |                         |                          |                          |                          |                          |                          |                          |                          |                          | 1.04<br>(0.96 - 1.13)    |
| Lactating                      | 3.14**<br>(1.54 - 6.41)  | 2.85**<br>(1.45 - 5.59) | 3.14**<br>(1.54 - 6.40)  | 3.25**<br>(1.57 - 6.69)  | 3.27**<br>(1.59 - 6.72)  | 3.35**<br>(1.62 - 6.95)  | 3.33**<br>(1.55 - 7.16)  | 3.03**<br>(1.48 - 6.20)  | 3.25**<br>(1.58 - 6.66)  | 3.13**<br>(1.54 - 6.40)  | 3.16**<br>(1.56 - 6.41)  |
| Pregnant                       | 0.59<br>(0.22 - 1.55)    | 0.62<br>(0.24 - 1.63)   | 0.59<br>(0.22 - 1.55)    | 0.57<br>(0.22 - 1.52)    | 0.57<br>(0.21 - 1.51)    | 0.58<br>(0.22 - 1.56)    | 0.54<br>(0.18 - 1.60)    | 0.57<br>(0.21 - 1.51)    | 0.61<br>(0.23 - 1.63)    | 0.54<br>(0.19 - 1.48)    | 0.65<br>(0.24 - 1.72)    |
| Lactating & pregnant           | 1.30<br>(0.36 - 4.69)    | 1.52<br>(0.40 - 5.81)   | 1.31<br>(0.37 - 4.68)    | 1.18<br>(0.34 - 4.05)    | 1.25<br>(0.36 - 4.38)    | 1.28<br>(0.37 - 4.44)    | 1.13<br>(0.31 - 4.05)    | 1.24<br>(0.33 - 4.62)    | 1.36<br>(0.38 - 4.94)    | 1.31<br>(0.36 - 4.75)    | 1.25<br>(0.34 - 4.56)    |
| Observations                   | 235                      | 235                     | 235                      | 235                      | 235                      | 235                      | 207                      | 231                      | 235                      | 235                      | 235                      |
| Log-Likelihood Full Model      | -141.6                   | -152.8                  | -141.6                   | -140.5                   | -140                     | -139.7                   | -122.9                   | -139.3                   | -141.1                   | -141.5                   | -142                     |
| Chi-square test                | 34.11                    | 17.88                   | 34.10                    | 34.13                    | 35.18                    | 34.68                    | 32.92                    | 32.66                    | 36.70                    | 35.35                    | 34.61                    |
| P-value of Chi-square test     | 3.88e-05                 | 0.0125                  | 1.65e-05                 | 8.48e-05                 | 0.000116                 | 0.000280                 | 0.000138                 | 0.000153                 | 2.97e-05                 | 2.30e-05                 | 3.15e-05                 |
| AIC                            | 301.2                    | 321.5                   | 299.2                    | 301                      | 301.9                    | 303.5                    | 265.8                    | 298.5                    | 302.3                    | 301                      | 302.1                    |
| BIC                            | 332.3                    | 349.2                   | 326.9                    | 335.6                    | 340                      | 345                      | 299.1                    | 332.9                    | 336.9                    | 332.1                    | 333.2                    |
| Pseudo R <sup>2</sup>          | 0.127                    | 0.0577                  | 0.127                    | 0.133                    | 0.137                    | 0.138                    | 0.142                    | 0.125                    | 0.129                    | 0.127                    | 0.124                    |
| Hosmer-Lemeshow P-value        | 0.298                    | 0.801                   | 0.238                    | 0.745                    | 0.364                    | 0.168                    | 0.153                    | 0.376                    | 0.498                    | 0.0440                   | 0.501                    |

**Supplemental Table 3. All multiple logistic regression models run for Tsimane' Children**

|                                | OR<br>(95% CI)         | OR<br>(95% CI)         | OR<br>(95% CI)          | OR<br>(95% CI)         | OR*<br>(95% CI)        | OR<br>(95% CI)         | OR<br>(95% CI)         | OR<br>(95% CI)         | OR<br>(95% CI)         | OR<br>(95% CI)         |
|--------------------------------|------------------------|------------------------|-------------------------|------------------------|------------------------|------------------------|------------------------|------------------------|------------------------|------------------------|
| Individual's age (years)       | 1.12<br>(1.00 - 1.26)  | 1.09<br>(0.97 - 1.22)  | 1.12<br>(0.99 - 1.26)   | 1.13*<br>(1.00 - 1.26) | 1.11<br>(0.99 - 1.24)  | 1.10<br>(0.98 - 1.24)  | 1.17*<br>(1.04 - 1.33) | 1.12<br>(1.00 - 1.26)  | 1.12<br>(1.00 - 1.25)  | 0.96<br>(0.76 - 1.21)  |
| Male                           | 1.13<br>(0.61 - 2.11)  | 1.03<br>(0.56 - 1.91)  | 1.10<br>(0.59 - 2.02)   | 1.16<br>(0.61 - 2.19)  | 1.15<br>(0.60 - 2.18)  | 1.15<br>(0.60 - 2.19)  | 1.13<br>(0.57 - 2.26)  | 1.18<br>(0.63 - 2.24)  |                        |                        |
| BMI (kg/m <sup>2</sup> )       | 1.00<br>(0.64 - 1.57)  | 0.97<br>(0.63 - 1.49)  | 0.99<br>(0.64 - 1.54)   | 0.98<br>(0.62 - 1.56)  | 0.98<br>(0.61 - 1.57)  | 0.95<br>(0.58 - 1.54)  | 0.94<br>(0.55 - 1.59)  | 1.04<br>(0.66 - 1.64)  |                        |                        |
| Afternoon sample               | 1.68<br>(0.86 - 3.30)  | 2.01*<br>(1.05 - 3.83) |                         | 1.61<br>(0.82 - 3.16)  | 1.65<br>(0.83 - 3.27)  | 1.63<br>(0.82 - 3.22)  | 1.54<br>(0.73 - 3.25)  | 1.74<br>(0.88 - 3.42)  | 1.67<br>(0.85 - 3.28)  | 1.62<br>(0.82 - 3.18)  |
| Heat Index                     | 1.20*<br>(1.04 - 1.39) |                        | 1.23**<br>(1.06 - 1.44) | 1.23*<br>(1.05 - 1.44) | 1.22*<br>(1.04 - 1.43) | 1.23*<br>(1.04 - 1.44) | 1.15<br>(1.00 - 1.33)  | 1.19*<br>(1.02 - 1.38) | 1.19*<br>(1.03 - 1.39) | 1.21*<br>(1.04 - 1.40) |
| Time to collect water (10 min) | 1.67<br>(0.85 - 3.26)  | 1.68<br>(0.79 - 3.55)  | 1.72<br>(0.91 - 3.23)   | 1.64<br>(0.85 - 3.17)  | 1.66<br>(0.85 - 3.22)  | 1.59<br>(0.82 - 3.09)  | 1.50<br>(0.67 - 3.39)  | 1.73<br>(0.87 - 3.45)  | 1.67<br>(0.85 - 3.28)  | 1.69<br>(0.86 - 3.31)  |
| HWISE score                    |                        |                        |                         | 1.12<br>(0.97 - 1.30)  | 1.09<br>(0.94 - 1.27)  | 1.28<br>(0.84 - 1.95)  |                        |                        |                        |                        |
| HFIAS score                    |                        |                        |                         |                        | 1.07<br>(0.99 - 1.15)  | 1.10<br>(1.00 - 1.21)  |                        |                        |                        |                        |
| HWISE x HFIAS Interaction      |                        |                        |                         |                        |                        | 0.98<br>(0.94 - 1.02)  |                        |                        |                        |                        |
| Born in wet season             |                        |                        |                         |                        |                        |                        | 1.12<br>(0.60 - 2.08)  |                        |                        |                        |
| Diarrhea or fever              |                        |                        |                         |                        |                        |                        |                        | 2.16<br>(0.71 - 6.56)  |                        |                        |
| Body fat percentage (BIA)      |                        |                        |                         |                        |                        |                        |                        |                        | 0.99<br>(0.92 - 1.05)  |                        |
| Calculated Fat-Free Mass       |                        |                        |                         |                        |                        |                        |                        |                        |                        | 1.06<br>(0.98 - 1.14)  |
| Observations                   | 219                    | 219                    | 219                     | 219                    | 219                    | 219                    | 188                    | 219                    | 219                    | 219                    |
| Log-Likelihood Full Model      | -134.6                 | -138.4                 | -136                    | -133.1                 | -131.6                 | -131.2                 | -115.5                 | -134                   | -134.7                 | -133.9                 |
| Chi-square test                | 17.12                  | 8.887                  | 13.18                   | 18.51                  | 22.26                  | 21.34                  | 14.58                  | 18.03                  | 17.01                  | 18.80                  |
| P-value of Chi-square test     | 0.00887                | 0.114                  | 0.0217                  | 0.00987                | 0.00445                | 0.0112                 | 0.0418                 | 0.0118                 | 0.00448                | 0.00210                |
| AIC                            | 283.3                  | 288.9                  | 284.1                   | 282.3                  | 281.3                  | 282.4                  | 247                    | 283.9                  | 281.3                  | 279.8                  |
| BIC                            | 307                    | 309.2                  | 304.4                   | 309.4                  | 311.8                  | 316.3                  | 272.9                  | 311                    | 301.6                  | 300.1                  |
| Pseudo R <sup>2</sup>          | 0.0669                 | 0.0406                 | 0.0573                  | 0.0773                 | 0.0877                 | 0.0907                 | 0.0569                 | 0.0716                 | 0.0668                 | 0.0720                 |
| Hosmer-Lemeshow P-value        | 0.350                  | 0.717                  | 0.735                   | 0.629                  | 0.603                  | 0.0130                 | 0.375                  | 0.444                  | 0.862                  | 0.399                  |

\*Note: Joint effects of HWISE score and HFIAS score were observed in the model without the interaction term (OR: 1.17, 95% CI: 1.00-1.36,  $P=0.048$ ).

**Supplemental Table 4. All multiple logistic regression models run for Daasanach Men**

|                                | OR<br>(95% CI)        |
|--------------------------------|-----------------------|-----------------------|-----------------------|-----------------------|-----------------------|-----------------------|-----------------------|-----------------------|-----------------------|-----------------------|-----------------------|
| Individual's age (years)       | 1.00<br>(0.97 - 1.04) | 1.01<br>(0.97 - 1.04) | 1.00<br>(0.96 - 1.04) | 1.00<br>(0.97 - 1.04) | 1.01<br>(0.97 - 1.04) | 1.01<br>(0.97 - 1.04) | 1.00<br>(0.97 - 1.04) | 1.01<br>(0.98 - 1.05) | 1.00<br>(0.97 - 1.04) | 1.01<br>(0.97 - 1.05) | 1.00<br>(0.96 - 1.05) |
| BMI (kg/m <sup>2</sup> )       | 0.81<br>(0.55 - 1.19) | 0.81<br>(0.56 - 1.18) | 0.80<br>(0.54 - 1.20) | 0.81<br>(0.55 - 1.19) | 0.80<br>(0.54 - 1.18) | 0.80<br>(0.54 - 1.19) | 0.81<br>(0.56 - 1.17) | 0.86<br>(0.60 - 1.23) | 0.81<br>(0.56 - 1.18) |                       |                       |
| Afternoon sample               | 1.65<br>(0.45 - 6.04) | 2.12<br>(0.74 - 6.04) |                       | 1.65<br>(0.44 - 6.12) | 1.59<br>(0.41 - 6.22) | 1.65<br>(0.44 - 6.19) | 1.63<br>(0.42 - 6.34) | 1.36<br>(0.34 - 5.47) | 1.62<br>(0.43 - 6.07) | 1.85<br>(0.48 - 7.11) | 1.69<br>(0.47 - 6.05) |
| Heat Index                     | 1.12<br>(0.78 - 1.61) |                       | 1.23<br>(0.91 - 1.64) | 1.12<br>(0.78 - 1.61) | 1.11<br>(0.78 - 1.57) | 1.10<br>(0.78 - 1.55) | 1.10<br>(0.74 - 1.64) | 1.15<br>(0.79 - 1.67) | 1.12<br>(0.78 - 1.60) | 1.14<br>(0.78 - 1.67) | 1.16<br>(0.81 - 1.66) |
| Time to collect water (10 min) | 1.00<br>(0.89 - 1.13) | 1.00<br>(0.88 - 1.13) | 1.00<br>(0.88 - 1.13) | 1.00<br>(0.89 - 1.13) | 0.99<br>(0.87 - 1.13) | 1.00<br>(0.87 - 1.13) | 1.00<br>(0.88 - 1.12) | 0.99<br>(0.87 - 1.13) | 1.00<br>(0.88 - 1.13) | 0.99<br>(0.88 - 1.12) | 0.99<br>(0.88 - 1.12) |
| HWISE score                    |                       |                       |                       | 1.00<br>(0.93 - 1.07) | 1.04<br>(0.96 - 1.12) | 1.07<br>(0.92 - 1.25) |                       |                       |                       |                       |                       |
| HFIAS score                    |                       |                       |                       |                       | 0.93<br>(0.83 - 1.03) | 0.96<br>(0.83 - 1.11) |                       |                       |                       |                       |                       |
| HWISE x HFIAS Interaction      |                       |                       |                       |                       |                       | 1.00<br>(0.99 - 1.01) |                       |                       |                       |                       |                       |
| Born in wet season             |                       |                       |                       |                       |                       |                       | 1.65<br>(0.55 - 4.92) |                       |                       |                       |                       |
| Days/week of meat/fish         |                       |                       |                       |                       |                       |                       |                       | 1.13<br>(0.85 - 1.50) |                       |                       |                       |
| Diarrhea or fever              |                       |                       |                       |                       |                       |                       |                       |                       | 0.53<br>(0.06 - 4.34) |                       |                       |
| Body fat percentage (BIA)      |                       |                       |                       |                       |                       |                       |                       |                       |                       | 0.97<br>(0.84 - 1.13) |                       |
| Calculated Fat-Free Mass       |                       |                       |                       |                       |                       |                       |                       |                       |                       |                       | 0.95<br>(0.83 - 1.09) |
| Observations                   | 107                   | 107                   | 107                   | 107                   | 107                   | 107                   | 107                   | 106                   | 107                   | 104                   | 104                   |
| Log-Likelihood Full Model      | -44.55                | -44.69                | -44.78                | -44.55                | -43.96                | -43.89                | -44.14                | -42.66                | -44.36                | -42.90                | -42.66                |
| Chi-square test                | 3.462                 | 2.893                 | 3.309                 | 3.560                 | 4.935                 | 5.132                 | 4.221                 | 3.700                 | 4.173                 | 3.253                 | 3.328                 |
| P-value of Chi-square test     | 0.629                 | 0.576                 | 0.507                 | 0.736                 | 0.668                 | 0.743                 | 0.647                 | 0.717                 | 0.653                 | 0.661                 | 0.650                 |
| AIC                            | 101.1                 | 99.38                 | 99.57                 | 103.1                 | 103.9                 | 105.8                 | 102.3                 | 99.31                 | 102.7                 | 97.80                 | 97.32                 |
| BIC                            | 117.1                 | 112.7                 | 112.9                 | 121.8                 | 125.3                 | 129.8                 | 121                   | 118                   | 121.4                 | 113.7                 | 113.2                 |
| Pseudo R <sup>2</sup>          | 0.0489                | 0.0460                | 0.0440                | 0.0489                | 0.0615                | 0.0630                | 0.0576                | 0.0517                | 0.0530                | 0.0392                | 0.0446                |
| Hosmer-Lemeshow P-value        | 0.374                 | 0.196                 | 0.264                 | 0.374                 | 0.199                 | 0.230                 | 0.161                 | 0                     | 0.344                 | 0.0700                | 0.312                 |

**Supplemental Table 5. All multiple logistic regression models run for Daasanach Women**

|                                | OR<br>(95% CI)          | OR<br>(95% CI)           | OR<br>(95% CI)           | OR<br>(95% CI)          | OR<br>(95% CI)          | OR*<br>(95% CI)         | OR<br>(95% CI)         | OR<br>(95% CI)         | OR<br>(95% CI)          | OR<br>(95% CI)         | OR<br>(95% CI)         |
|--------------------------------|-------------------------|--------------------------|--------------------------|-------------------------|-------------------------|-------------------------|------------------------|------------------------|-------------------------|------------------------|------------------------|
| Individual's age (years)       | 0.95<br>(0.89 - 1.01)   | 0.95<br>(0.89 - 1.02)    | 0.94*<br>(0.89 - 1.00)   | 0.95<br>(0.88 - 1.01)   | 0.94<br>(0.88 - 1.01)   | 0.93<br>(0.87 - 1.00)   | 0.95<br>(0.89 - 1.02)  | 0.95<br>(0.88 - 1.02)  | 0.95<br>(0.89 - 1.01)   | 0.95<br>(0.88 - 1.01)  | 0.97<br>(0.91 - 1.02)  |
| BMI (kg/m <sup>2</sup> )       | 1.22**<br>(1.05 - 1.42) | 1.19*<br>(1.04 - 1.36)   | 1.22*<br>(1.05 - 1.42)   | 1.24**<br>(1.05 - 1.46) | 1.25**<br>(1.06 - 1.48) | 1.32**<br>(1.10 - 1.59) | 1.21*<br>(1.04 - 1.42) | 1.22*<br>(1.03 - 1.43) | 1.23**<br>(1.06 - 1.43) |                        |                        |
| Afternoon sample               | 2.12<br>(0.49 - 9.24)   | 4.98**<br>(1.57 - 15.84) |                          | 2.28<br>(0.51 - 10.15)  | 2.30<br>(0.53 - 10.04)  | 2.52<br>(0.56 - 11.36)  | 2.42<br>(0.52 - 11.36) | 1.83<br>(0.36 - 9.42)  | 2.00<br>(0.46 - 8.66)   | 2.67<br>(0.60 - 11.83) | 1.97<br>(0.45 - 8.66)  |
| Heat Index                     | 1.49*<br>(1.03 - 2.14)  |                          | 1.69***<br>(1.27 - 2.25) | 1.47*<br>(1.01 - 2.14)  | 1.48*<br>(1.03 - 2.13)  | 1.48*<br>(1.02 - 2.15)  | 1.47*<br>(1.01 - 2.14) | 1.46<br>(0.96 - 2.23)  | 1.54*<br>(1.04 - 2.28)  | 1.44*<br>(1.03 - 2.03) | 1.45*<br>(1.04 - 2.01) |
| Time to collect water (10 min) | 0.91<br>(0.78 - 1.05)   | 0.94<br>(0.82 - 1.07)    | 0.90<br>(0.78 - 1.03)    | 0.91<br>(0.79 - 1.04)   | 0.91<br>(0.79 - 1.05)   | 0.90<br>(0.78 - 1.04)   | 0.90<br>(0.78 - 1.03)  | 0.90<br>(0.79 - 1.04)  | 0.91<br>(0.79 - 1.05)   | 0.89<br>(0.77 - 1.03)  | 0.91<br>(0.78 - 1.06)  |
| HWISE score                    |                         |                          |                          | 1.03<br>(0.96 - 1.11)   | 1.01<br>(0.91 - 1.11)   | 1.14<br>(0.96 - 1.37)   |                        |                        |                         |                        |                        |
| HFIAS score                    |                         |                          |                          |                         | 1.04<br>(0.91 - 1.18)   | 1.19<br>(1.00 - 1.43)   |                        |                        |                         |                        |                        |
| HWISE x HFIAS Interaction      |                         |                          |                          |                         |                         | 0.99<br>(0.98 - 1.00)   |                        |                        |                         |                        |                        |
| Born in wet season             |                         |                          |                          |                         |                         |                         | 1.68<br>(0.42 - 6.78)  |                        |                         |                        |                        |
| Days/week of meat/fish         |                         |                          |                          |                         |                         |                         |                        | 1.07<br>(0.84 - 1.36)  |                         |                        |                        |
| Diarrhea or fever              |                         |                          |                          |                         |                         |                         |                        |                        | 2.11<br>(0.49 - 9.05)   |                        |                        |
| Body fat percentage (BIA)      |                         |                          |                          |                         |                         |                         |                        |                        |                         | 1.10*<br>(1.02 - 1.19) |                        |
| Calculated Fat-Free Mass       |                         |                          |                          |                         |                         |                         |                        |                        |                         |                        | 1.13<br>(0.99 - 1.29)  |
| Lactating                      | 2.03<br>(0.54 - 7.61)   | 1.89<br>(0.50 - 7.19)    | 1.96<br>(0.53 - 7.19)    | 1.85<br>(0.47 - 7.30)   | 1.89<br>(0.46 - 7.69)   | 1.93<br>(0.49 - 7.68)   | 2.16<br>(0.54 - 8.59)  | 2.71<br>(0.68 - 10.73) | 1.90<br>(0.50 - 7.21)   | 1.93<br>(0.49 - 7.63)  | 2.28<br>(0.60 - 8.60)  |
| Pregnant                       | 3.03<br>(0.52 - 17.80)  | 3.45<br>(0.48 - 24.59)   | 2.56<br>(0.51 - 12.71)   | 2.82<br>(0.46 - 17.39)  | 2.65<br>(0.42 - 16.58)  | 2.30<br>(0.34 - 15.77)  | 2.94<br>(0.49 - 17.67) | 3.42<br>(0.58 - 20.03) | 3.31<br>(0.54 - 20.43)  | 2.67<br>(0.39 - 18.34) | 3.31<br>(0.55 - 19.79) |
| Observations                   | 120                     | 120                      | 120                      | 120                     | 120                     | 120                     | 120                    | 116                    | 120                     | 119                    | 119                    |
| Log-Likelihood Full Model      | -41.78                  | -43.73                   | -42.34                   | -41.53                  | -41.42                  | -40.47                  | -41.45                 | -40.33                 | -41.40                  | -41.70                 | -43.17                 |
| Chi-square test                | 24.19                   | 25.21                    | 20.79                    | 22.86                   | 22.56                   | 25.25                   | 24.81                  | 22.89                  | 23.77                   | 23.14                  | 26.12                  |
| P-value of Chi-square test     | 0.00105                 | 0.000312                 | 0.00200                  | 0.00354                 | 0.00727                 | 0.00490                 | 0.00168                | 0.00351                | 0.00250                 | 0.00161                | 0.000479               |
| AIC                            | 99.56                   | 101.5                    | 98.68                    | 101.1                   | 102.8                   | 102.9                   | 100.9                  | 98.65                  | 100.8                   | 99.40                  | 102.3                  |
| BIC                            | 121.9                   | 121                      | 118.2                    | 126.1                   | 130.7                   | 133.6                   | 126                    | 123.4                  | 125.9                   | 121.6                  | 124.6                  |
| Pseudo R <sup>2</sup>          | 0.249                   | 0.214                    | 0.239                    | 0.254                   | 0.256                   | 0.273                   | 0.255                  | 0.244                  | 0.256                   | 0.248                  | 0.222                  |
| Hosmer-Lemeshow P-value        | 0.510                   | 0.0510                   | 0.578                    | 0.314                   | 0.502                   | 0.368                   | 0.897                  | 0.390                  | 0.321                   | 0.475                  | 0.0910                 |

\*Note: Joint effects were observed for HWISE score, HFIAS score, and their interaction term (OR: 1.35, 95% CI: 1.02-1.80, P=0.037).



**Supplemental Table 6. All multiple logistic regression models run for Daasanach Children**

|                                | OR<br>(95% CI)            | OR<br>(95% CI)            | OR<br>(95% CI)        | OR<br>(95% CI)            | OR<br>(95% CI)            | OR<br>(95% CI)            | OR<br>(95% CI)             | OR<br>(95% CI)            | OR<br>(95% CI)            | OR<br>(95% CI)             |
|--------------------------------|---------------------------|---------------------------|-----------------------|---------------------------|---------------------------|---------------------------|----------------------------|---------------------------|---------------------------|----------------------------|
| Individual's age (years)       | 1.09<br>(0.93 - 1.28)     | 1.09<br>(0.93 - 1.28)     | 1.10<br>(0.95 - 1.28) | 1.09<br>(0.93 - 1.28)     | 1.10<br>(0.93 - 1.29)     | 1.10<br>(0.93 - 1.30)     | 1.08<br>(0.92 - 1.28)      | 1.09<br>(0.93 - 1.29)     | 1.06<br>(0.89 - 1.27)     | 1.48<br>(0.98 - 2.22)      |
| Male                           | 1.16<br>(0.41 - 3.34)     | 1.16<br>(0.41 - 3.32)     | 1.41<br>(0.54 - 3.63) | 1.17<br>(0.40 - 3.46)     | 1.14<br>(0.38 - 3.39)     | 1.11<br>(0.38 - 3.25)     | 1.10<br>(0.36 - 3.35)      | 1.16<br>(0.40 - 3.33)     |                           |                            |
| BMI (kg/m <sup>2</sup> )       | 1.17<br>(0.67 - 2.03)     | 1.17<br>(0.67 - 2.06)     | 1.38<br>(0.78 - 2.44) | 1.17<br>(0.67 - 2.03)     | 1.20<br>(0.68 - 2.14)     | 1.21<br>(0.68 - 2.14)     | 1.14<br>(0.62 - 2.10)      | 1.15<br>(0.67 - 1.98)     |                           |                            |
| Afternoon sample               | 8.96***<br>(2.49 - 32.20) | 8.53***<br>(3.18 - 22.87) |                       | 9.00***<br>(2.50 - 32.37) | 9.21***<br>(2.63 - 32.25) | 9.41***<br>(2.68 - 32.98) | 10.52***<br>(2.83 - 39.17) | 9.31***<br>(2.52 - 34.38) | 9.57***<br>(2.63 - 34.78) | 12.89***<br>(3.34 - 49.69) |
| Heat Index                     | 0.98<br>(0.69 - 1.38)     |                           | 1.35<br>(0.96 - 1.90) | 0.98<br>(0.69 - 1.39)     | 0.99<br>(0.70 - 1.40)     | 0.98<br>(0.69 - 1.38)     | 0.99<br>(0.70 - 1.40)      | 0.97<br>(0.69 - 1.38)     | 1.03<br>(0.69 - 1.52)     | 1.00<br>(0.67 - 1.48)      |
| Time to collect water (10 min) | 0.94<br>(0.86 - 1.02)     | 0.94<br>(0.86 - 1.02)     | 0.96<br>(0.88 - 1.05) | 0.94<br>(0.86 - 1.02)     | 0.94<br>(0.87 - 1.02)     | 0.94<br>(0.86 - 1.02)     | 0.94<br>(0.86 - 1.02)      | 0.94<br>(0.86 - 1.02)     | 0.92*<br>(0.86 - 1.00)    | 0.92*<br>(0.84 - 1.00)     |
| HWISE score                    |                           |                           |                       | 1.00<br>(0.93 - 1.09)     | 0.98<br>(0.87 - 1.12)     | 1.05<br>(0.83 - 1.34)     |                            |                           |                           |                            |
| HFIAS score                    |                           |                           |                       |                           | 1.04<br>(0.90 - 1.20)     | 1.10<br>(0.89 - 1.36)     |                            |                           |                           |                            |
| HWISE x HFIAS Interaction      |                           |                           |                       |                           |                           | 1.00<br>(0.99 - 1.01)     |                            |                           |                           |                            |
| Born in wet season             |                           |                           |                       |                           |                           |                           | 3.52*<br>(1.28 - 9.65)     |                           |                           |                            |
| Diarrhea or fever              |                           |                           |                       |                           |                           |                           |                            | 0.76<br>(0.21 - 2.70)     |                           |                            |
| Body fat percentage (BIA)      |                           |                           |                       |                           |                           |                           |                            |                           | 0.96<br>(0.83 - 1.10)     |                            |
| Calculated Fat-Free Mass       |                           |                           |                       |                           |                           |                           |                            |                           |                           | 0.87<br>(0.74 - 1.02)      |
| Observations                   | 102                       | 102                       | 102                   | 102                       | 102                       | 102                       | 102                        | 102                       | 98                        | 98                         |
| Log-Likelihood Full Model      | -52.41                    | -52.42                    | -59.23                | -52.40                    | -52.24                    | -52.08                    | -49.31                     | -52.33                    | -49.10                    | -48.08                     |
| Chi-square test                | 22.79                     | 22.81                     | 5.225                 | 23.43                     | 23.60                     | 25.51                     | 28.30                      | 22.70                     | 23.69                     | 26.73                      |
| P-value of Chi-square test     | 0.000869                  | 0.000368                  | 0.389                 | 0.00143                   | 0.00268                   | 0.00246                   | 0.000194                   | 0.00192                   | 0.000249                  | 6.44e-05                   |
| AIC                            | 118.8                     | 116.8                     | 130.5                 | 120.8                     | 122.5                     | 124.2                     | 114.6                      | 120.7                     | 110.2                     | 108.2                      |
| BIC                            | 137.2                     | 132.6                     | 146.2                 | 141.8                     | 146.1                     | 150.4                     | 135.6                      | 141.7                     | 125.7                     | 123.7                      |
| Pseudo R <sup>2</sup>          | 0.174                     | 0.174                     | 0.0665                | 0.174                     | 0.177                     | 0.179                     | 0.223                      | 0.175                     | 0.197                     | 0.214                      |
| Hosmer-Lemeshow P-value        | 0.180                     | 0.0320                    | 0.588                 | 0.389                     | 0.348                     | 0.0520                    | 0.340                      | 0.773                     | 0.754                     | 0.414                      |

## SUPPLEMENTAL FIGURES

### Supplemental Figure 1. Urine Specific Gravity by Ambient Temperature

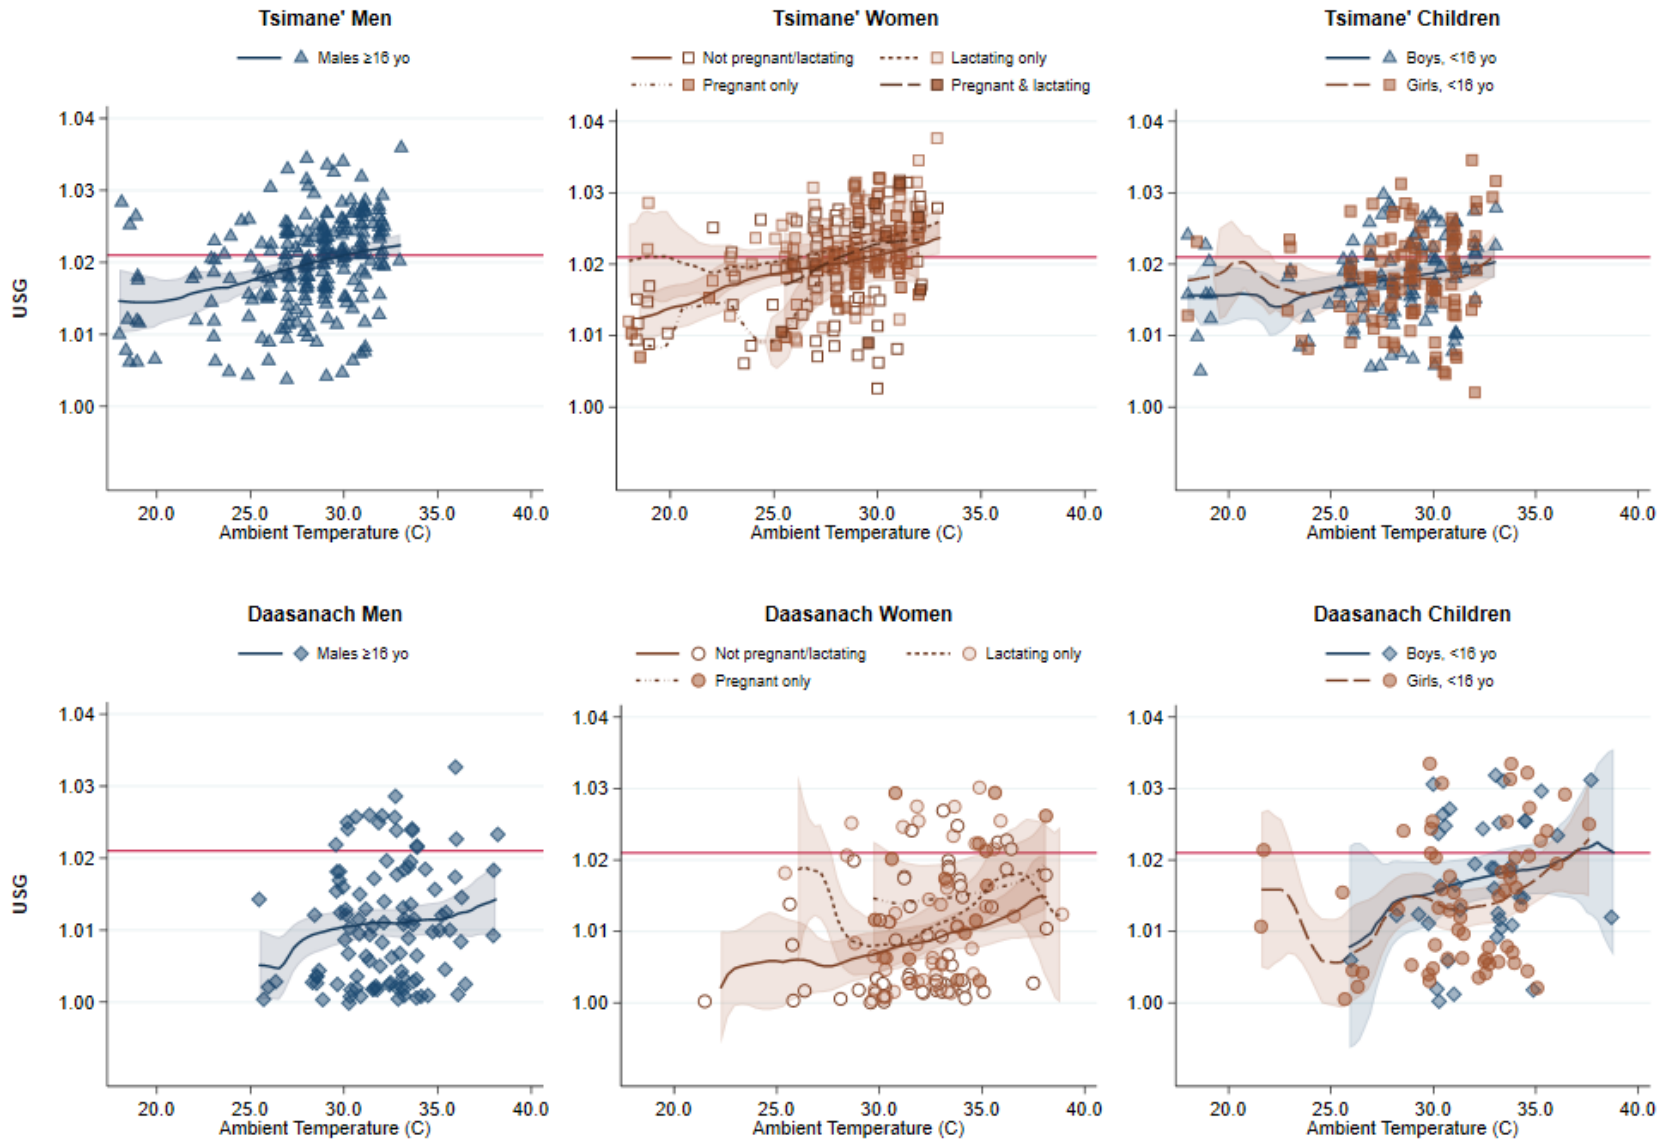

Local polynomial smooth plots with CIs

## Supplemental Figure 2. Urine Specific Gravity by Relative Humidity

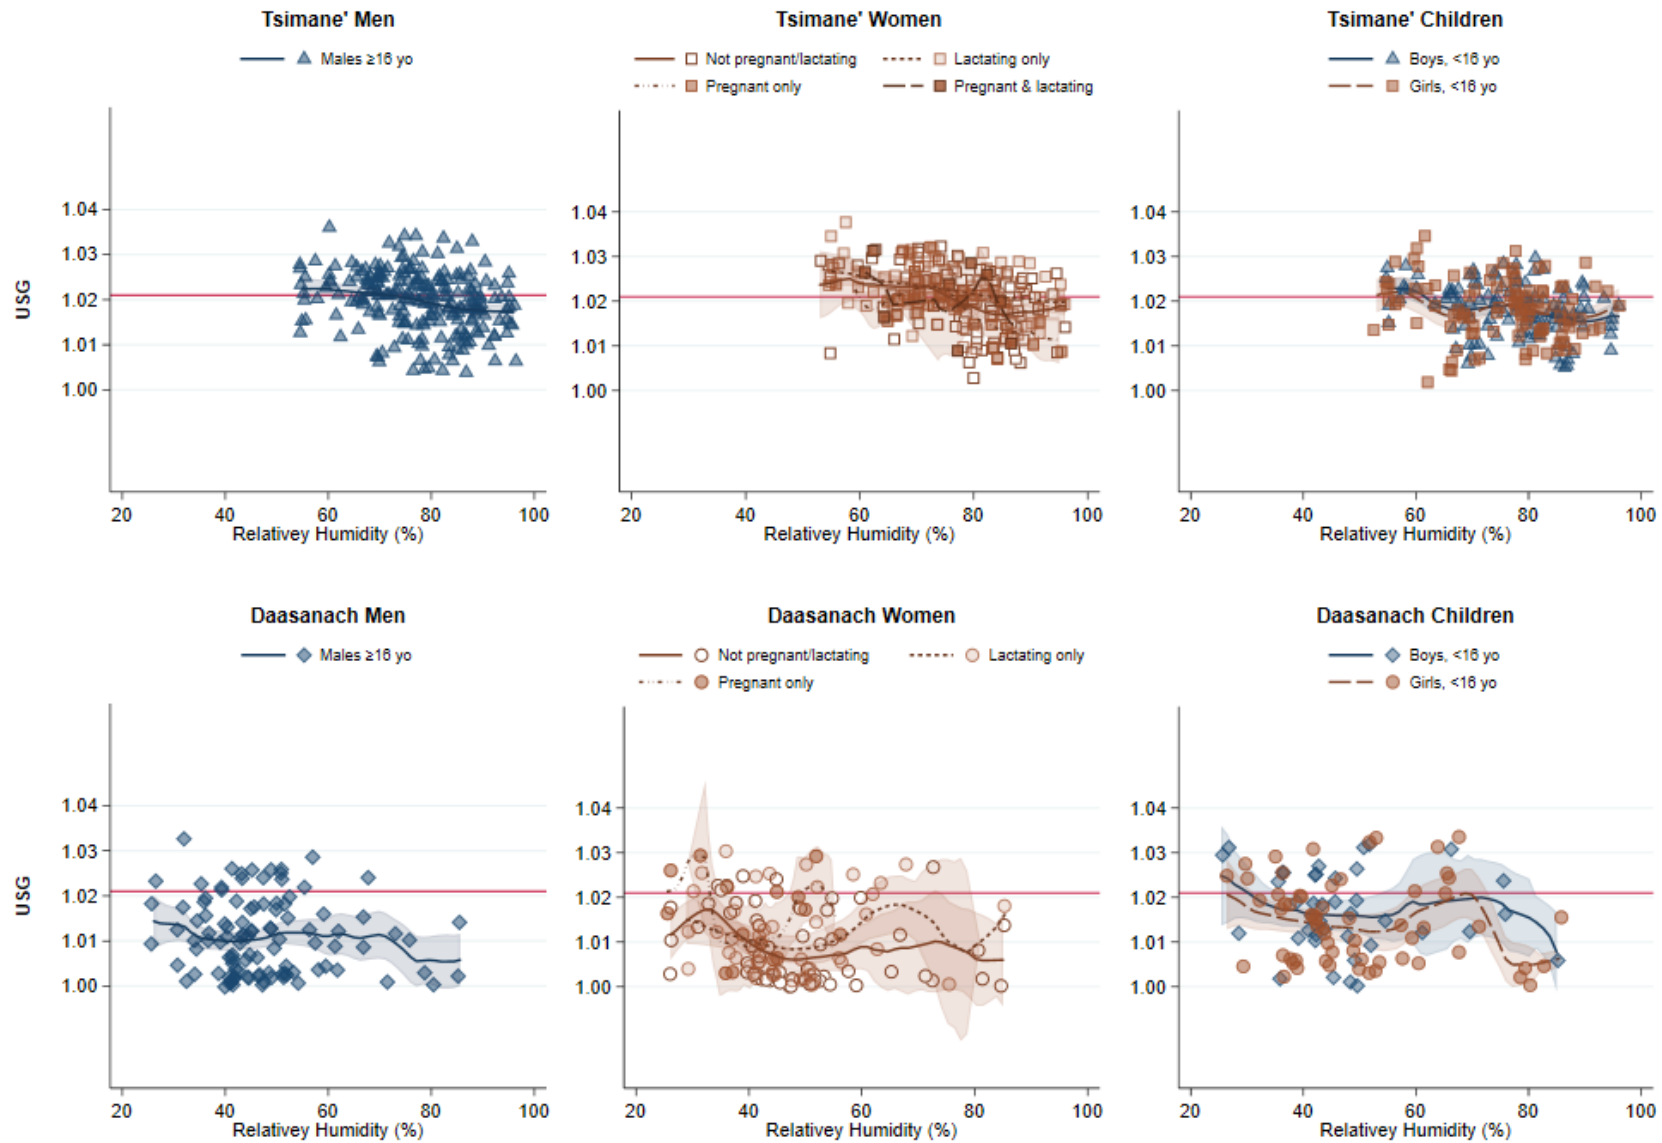

Local polynomial smooth plots with CIs

## REFERENCES FOR SUPPLEMENTAL INFORMATION

- Coates, J., Swindale, A., & Bilinsky, P. (2007). *Household Food Insecurity Access Scale (HFIAS) for Measurement of Household Food Access: Indicator Guide (v. 3)*. Washington, D.C.: Food and Nutrition Technical Assistance Project, Academy for Educational Development.
- Young, S. L., Boateng, G. O., Jamaluddine, Z., Miller, J. D., Frongillo, E. A., Neilands, T. B., . . . Stoler, J. (2019). The Household Water InSecurity Experiences (HWISE) Scale: development and validation of a household water insecurity measure for low-income and middle-income countries. *BMJ Global Health*, *4*(5), e001750. doi:10.1136/bmjgh-2019-001750
- Young, S. L., Collins, S. M., Boateng, G. O., Neilands, T. B., Jamaluddine, Z., Miller, J. D., . . . Wutich, A. (2019). Development and validation protocol for an instrument to measure household water insecurity across cultures and ecologies: the Household Water InSecurity Experiences (HWISE) Scale. *BMJ Open*, *9*(1), e023558. doi:10.1136/bmjopen-2018-023558
